# Supplementary material
Source: publisher site journal article supplement (https://www.spandidos-publications.com/5293/downloadSupplementary)

Figure S1. Calibration plots of the developed nomogram. (A) Training data set. (B) Validation data set.

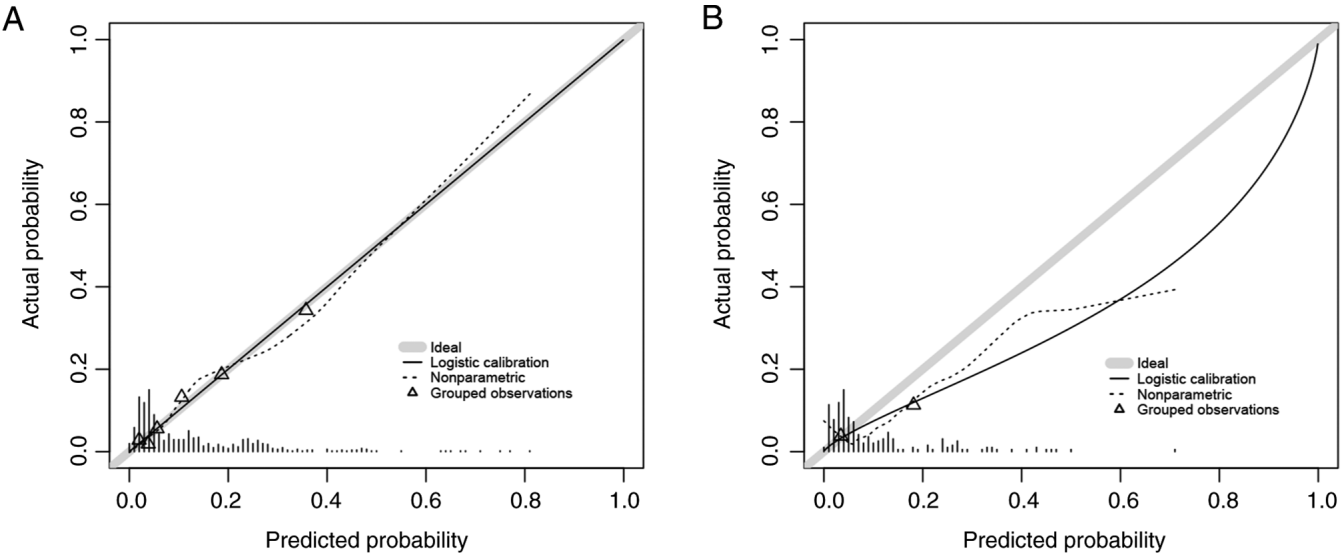

Figure S2. Nomogram predicting lymph node metastasis using four factors. The sum of the variable points was plotted on the total point axis. By drawing a vertical line from the plotted total point axis straight down to the predicting probability axis, the estimated lymph node metastasis rate can be obtained. The area under the curve was 0.775 in the training set and 0.692 in the validation set.

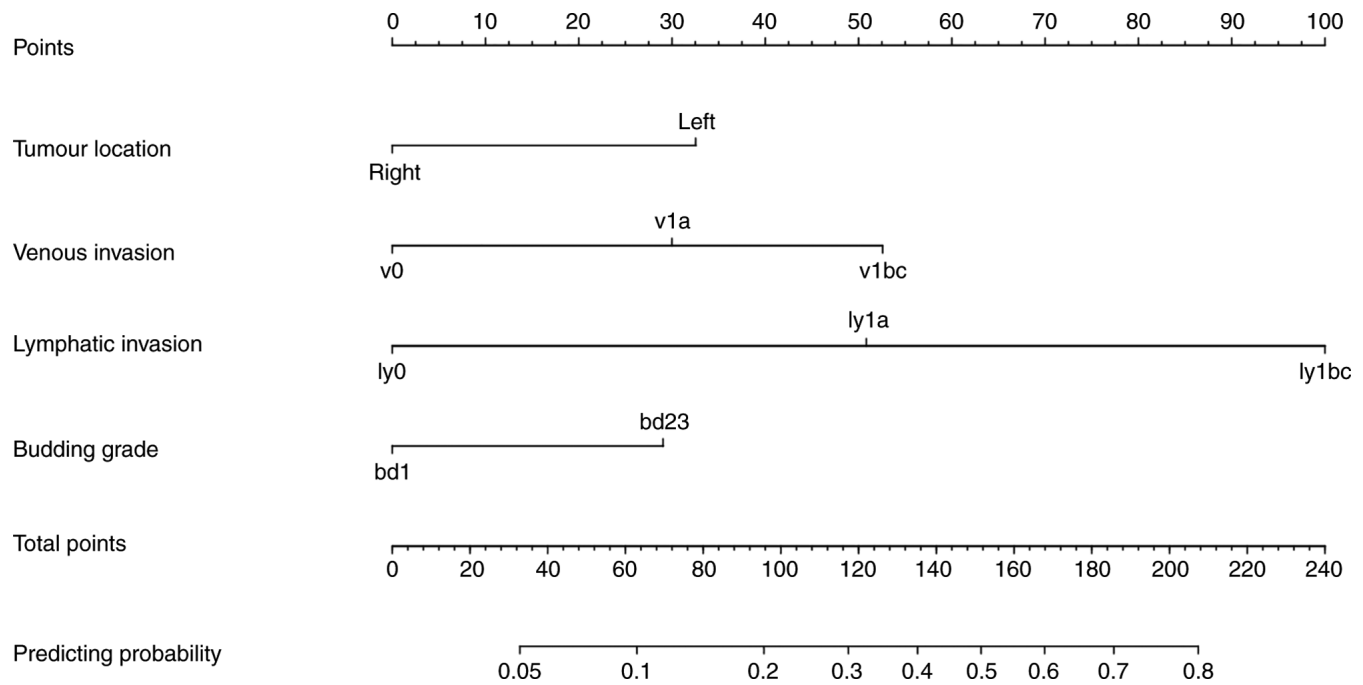

Figure S3. Calibration plots of the nomogram developed using four factors. (A) Training data set. (B) Validation data set.

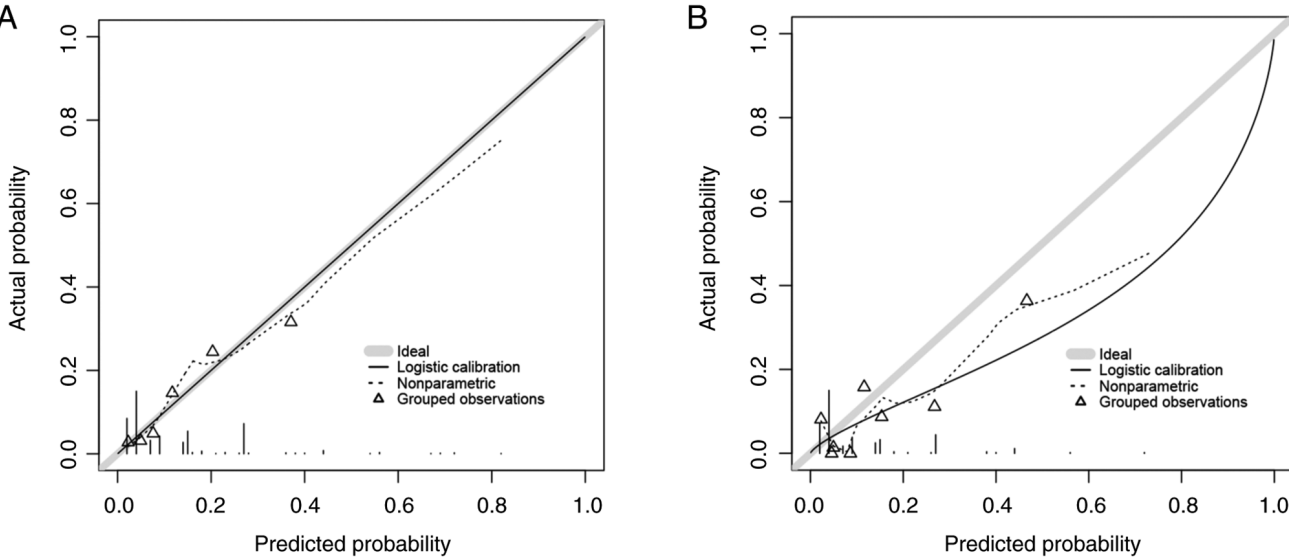

Figure S4. Receiver operating characteristic curve of the developed nomogram.

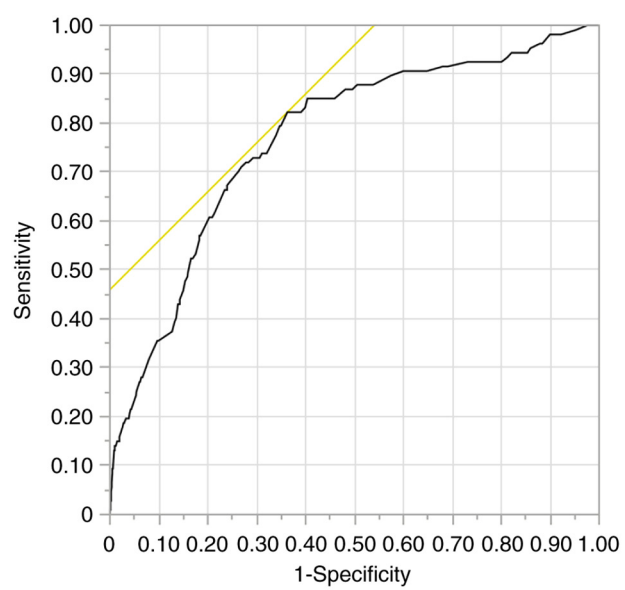

Figure S5. Nomogram scores of all patients. (A) Patients with positive lymph nodes. (B) patients with negative lymph nodes. Each bar represents the score for each patient, and none of the patients with positive lymph node metastasis had <90 points (the cut-off value).

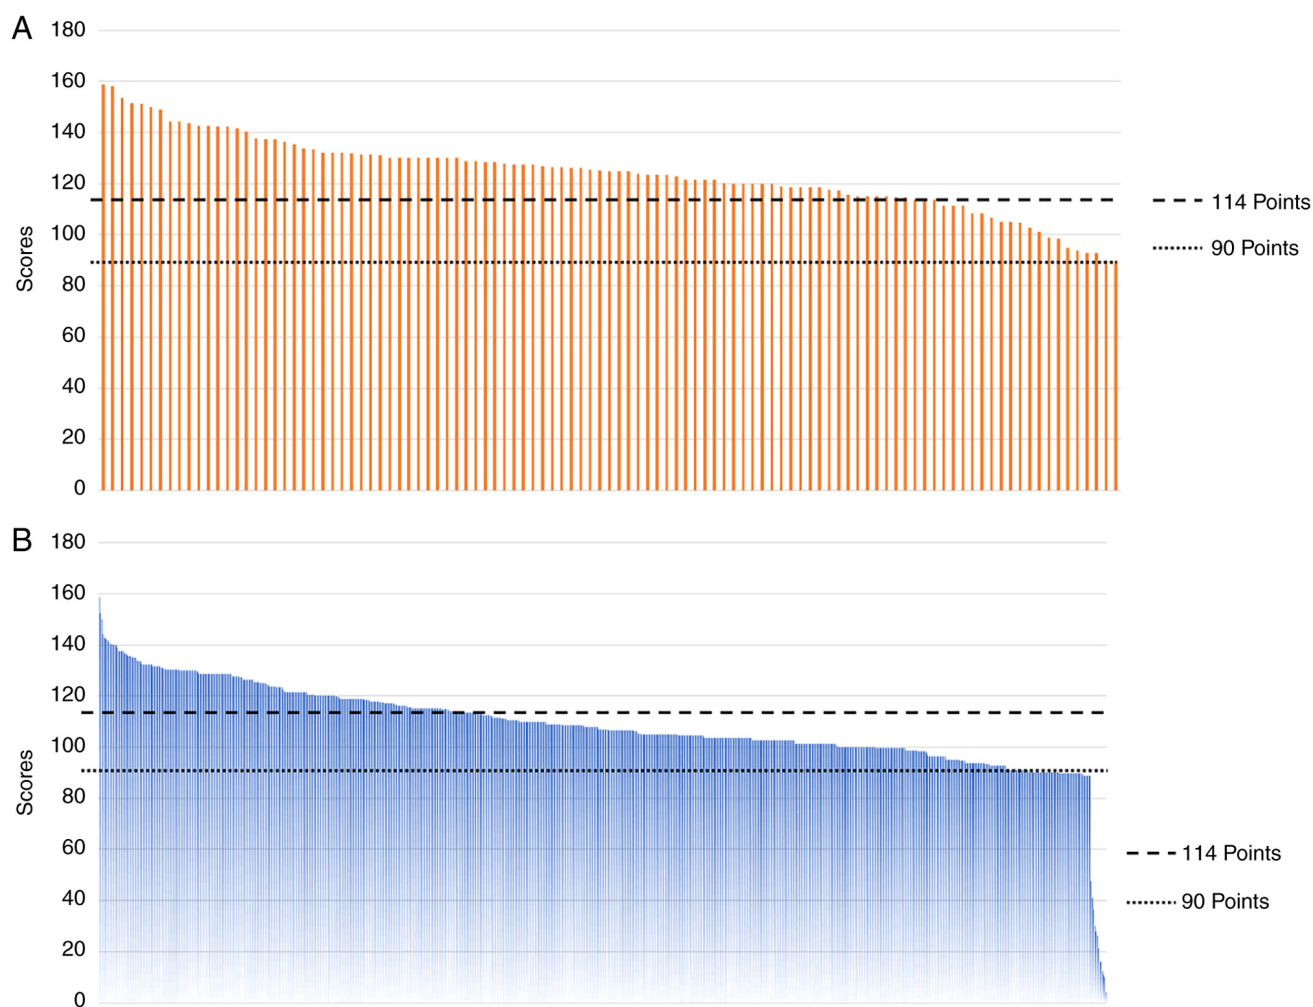

Supplement: Supplementary file 1 [file downloadSupplementary]
